# Supplementary material for: Microrobot with Gyroid Surface and Gold Nanostar for High Drug Loading and Near-Infrared-Triggered Chemo-Photothermal Therapy
Source: MDPI journal article supplement (doi:10.3390/pharmaceutics14112393), 2022-11-06
Supplement: s1 [file s1]

*Supplementary material*

# Microrobot with Gyroid Surface and Gold Nanostar for High Drug Loading and Near-Infrared-Triggered Chemo-Photothermal Therapy

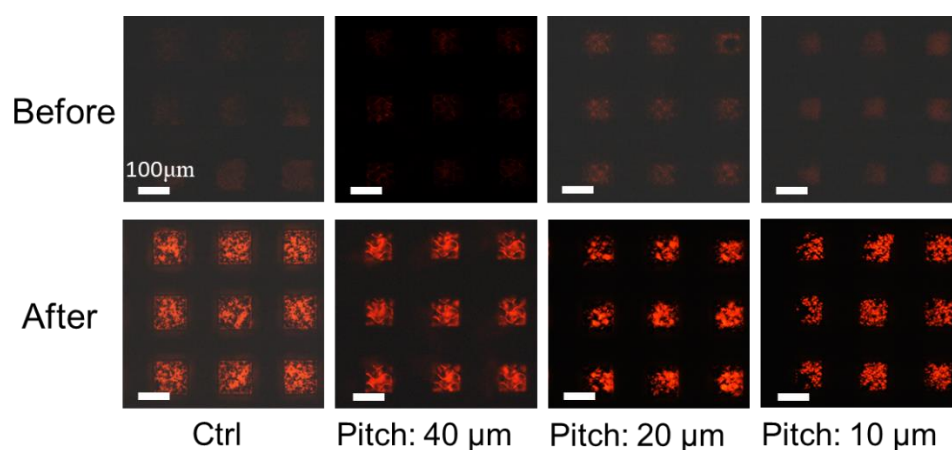

**Figure S1.** Fluorescence images of solid cubic and different types of GS-MCs before and after drug loading.

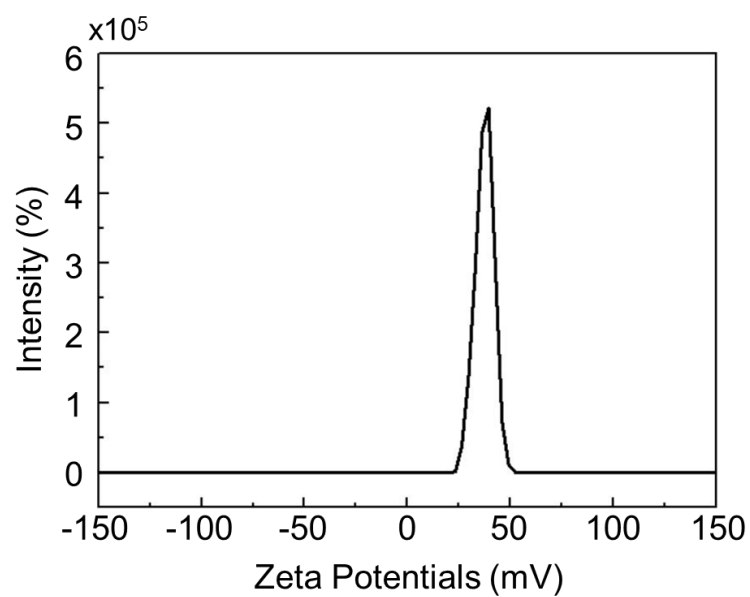

**Figure S2.** Zeta potential graph showing that the ionic surface charge of MNPs is positive.

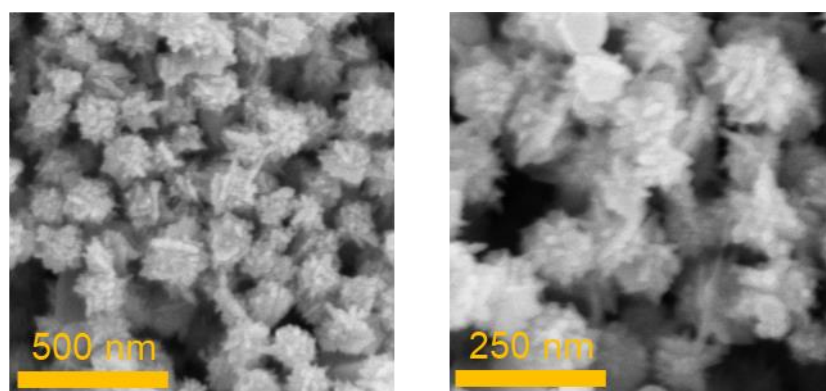

**Figure S3.** SEM images of the Au-nanostar.

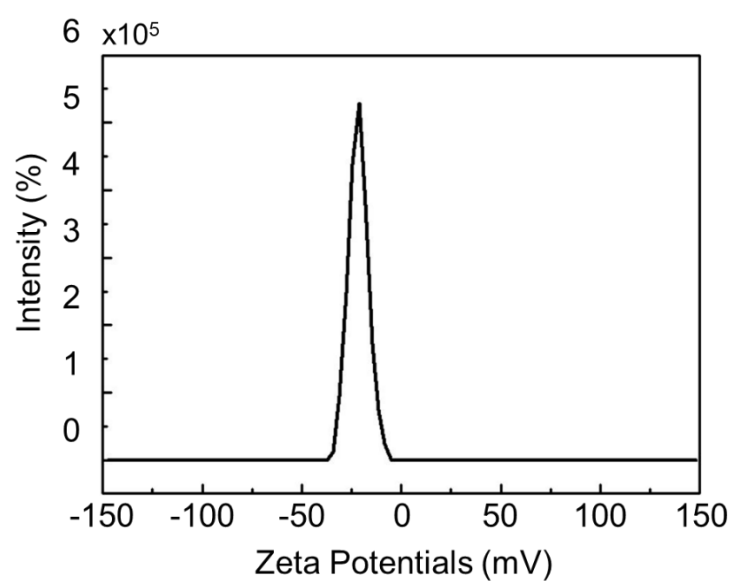

**Figure S4.** Zeta potential graph showing that the ionic surface charge of Au-nanostar is negative.

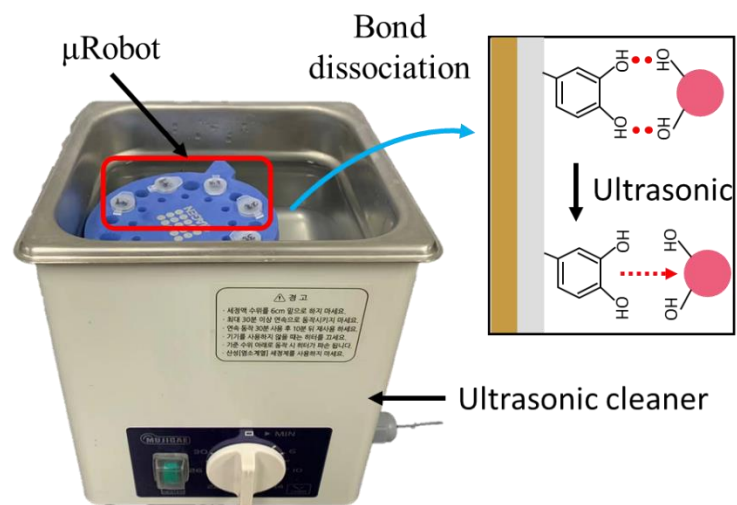

**Figure S5.** GS-HMs placed in an EP tube and in a ultrasonic cleaner to dissociate the noncovalently bonded doxorubicin (DOX) molecules.

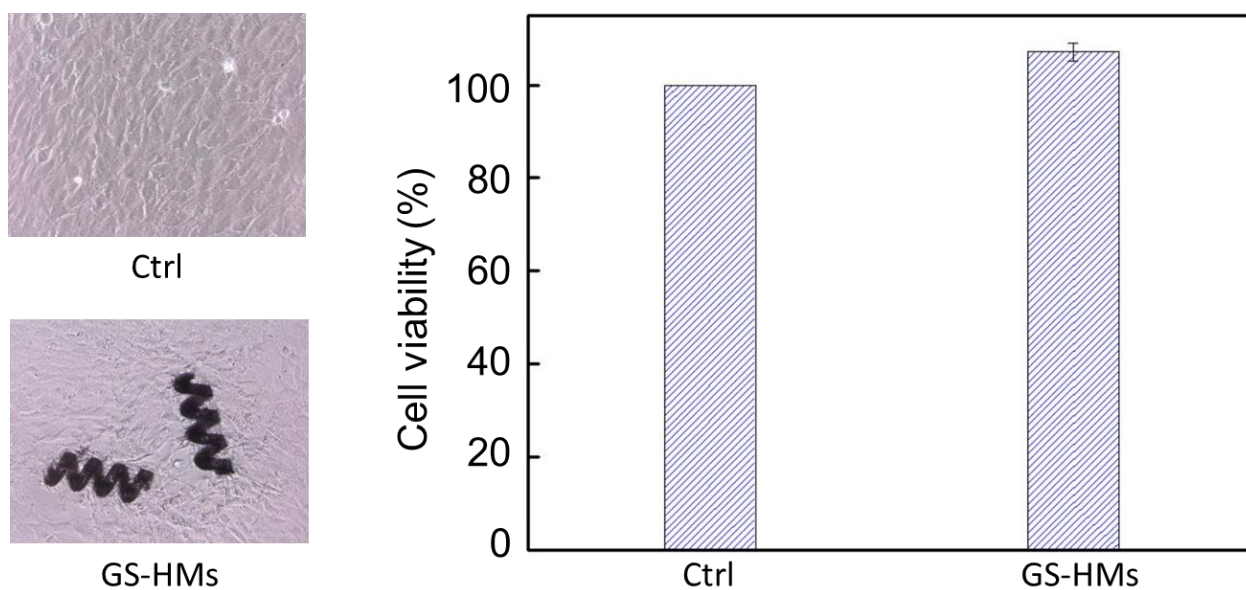

**Figure S6.** Cell viability of GS-HMs against normal cells.

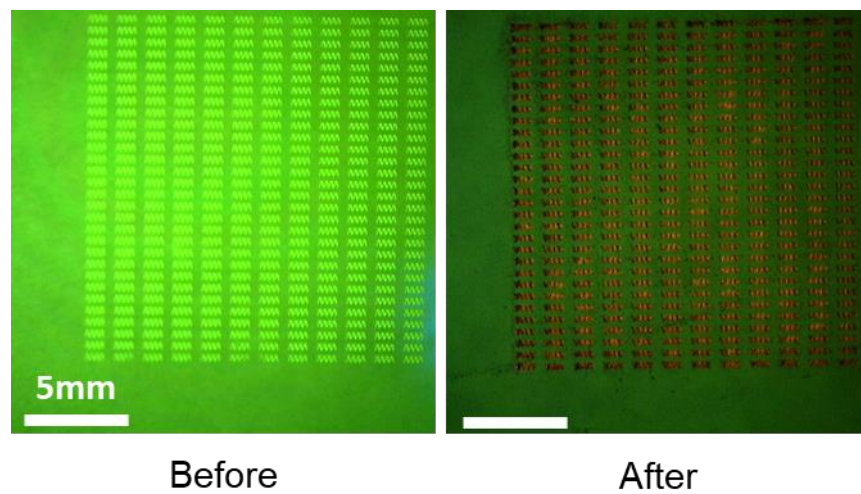

**Figure S7.** Pen microscopy fluorescence images before and after DOX loading into the GS-HMs.
